# Supplementary material for: Metformin and Ganwei for Metabolic Dysfunction Associated Fatty Liver Disease: A Randomized, Placebo-Controlled Trial
Source: Preprints.org preprint supplement (doi:10.20944/preprints202407.1787.v1), 2024-07-23
Supplement: Supplementary file 1 [file supplementary]

## Sheet: 工作表1
Site ID or Number	Subject ID or Number	Subject Sex	Subject Date Of Birth	GNMT Genotype	Visit ID or Number	Visit Name	Visit Type	Central Laboratory ID	Record Extension Type	Actual Collection Date and Time	Subject Age at Collection	Subject Age Units	Fasting Status	Battery ID	Performing Laboratory ID	Lab Test ID	Test ID	Reported Text Result	Reported Numeric Result	Reported Numeric Result Precision	Group	體溫(BT)	脈搏(HR)	呼吸(RR)	血壓(BP)	身高(Height)(cm)	體重(body weight)(kg)	身體質量指數(BMI)(kg/m2)	WBC(10^3/ul)	Hb(g/dl)	RBC(10^6/ul)	Platelet(10^3/ul)	Neutrophil(%)	Lymphocyte(%)	AST(U/L)	ALT(U/L)	Cr(mg/dl)	eGFR(ml/min/1.73m2)	UA	Cholesterol(mg/dL)	HDL(mg/dL)	LDL(mg/dL)	TG(mg/dl)	AC sugar(mg/dl)	HbA1C	AC insulin	CRP	FibroScan(kPa)	FibroScan(CAP)
15058943	RA-01-D	F	1954-01-28	C/C	1	screening、Visit1	S		BASE	2021-09-22	67.65	Y	N								D	36.7	62	20	145/88	159	67.9	26.8	5.57	14.4	4.64	154	53	38.4	43	57	0.7	88.45	6.7	232	56	163	140	114	5.7	35.24	0.99	7.5	279
20324286	RA-02-C	M	1964-04-13	C/C	1	screening、Visit1	S		BASE	2021-09-23	57.4444	Y	N								C	36.4	70	20	124/87	173	83.7	27.9	6.92	16.5	5.45	303	58.1	31.5	32	60	1	81.86	6.5	204	42	135	207	124	6.6	20.7	1.51	8.8	400
20088899	RA-03-C	M	1984-01-21	C/C	1	screening、Visit1	S		BASE	2021-09-23	37.6722	Y	N								C	36.4	88	18	135/90	181	113.7	34.7	7.23	15.7	5.11	252	62.2	32.5	36	80	0.8	115.61	6.2	202	43	131	233	92	5.4	25.02	4.69	9.6	340
12788461	RA-04-A	M	1974-05-14	C/C	1	screening、Visit1	S		BASE	2021-09-27	47.3694	Y	N								A	36.8	84	14	141/99	168	98.1	34.7	6.49	17.4	5.59	275	50.5	40.4	91	172	0.8	110.13	6.3	178	40	124	82	95	6.1	56.52	2.12	15.8	360
61324299	RA-05-D	M	1970-10-27	C/T	1	screening、Visit1	S		BASE	2021-09-29	50.9222	Y	N								D	36.5	77	14	141/92	170	130	44.9	6.74	15.6	5.09	147	68.9	22.7	31	55	0.9	94.93	7	228	45	173	79	102	6.7	69.83	6.41	25.8	375
20153903	RA-06-A	M	1966-12-02	C/C	1	screening、Visit1	S		BASE	2021-10-06	54.8444	Y	N								A	36.5	69	18	135/87	164.2	59.7	22.1	6.18	16.3	5.42	221	62.3	32	45	89	0.9	93.46	7.4	205	45	152	114	93	5.7	10.44	0.96	6.2	367
16174459	RA-07-D	F	1942-10-05	C/C	1	screening、Visit1	S		BASE	2021-10-12	79.0194	Y	N								D	37.3	67	16	161/93	154.1	54.2	22.8	7.33	14.9	4.91	201	60.2	33.4	86	106	0.8	73.54	4.4	182	57	121	77	111	6.2	17.92	<0.60	5.1	257
76198455	RA-09-B	M	1973-03-17	C/T	1	screening、Visit1	S		BASE	2021-10-20	48.5917	Y	N								B	36.9	84	18	120/75	178	84.3	26.6	7.18	15	4.57	242	70.3	22.8	65	78	0.9	95.72	7.4	169	45	94	263	107	5.7	11.12	0.8	12.8	396
19710025	RA-10-A	F	1959-09-03	C/C	1	screening、Visit1	S		BASE	2021-10-25	62.1444	Y	N								A	36.2	60	16	142/84	151.6	58	25.2	6.56	14.9	5.08	312	62.2	29.9	73	99	0.8	77.25	5.6	203	59	129	156	89	6	9.52	1.6	7.3	336
18253119	RA-11-C	M	1965-09-25	C/C	1	screening、Visit1	S		BASE	2021-10-26	56.0861	Y	N								C	36.5	80	16	144/98	171.5	79.9	27.1	7.59	17.1	5.44	257	50.1	38.6	45	87	0.9	92.78	5.5	183	60	113	79	94	5.8	22.75	<0.60	5.2	326
19374548	RA-12-B	F	1947-02-12	C/T	1	screening、Visit1	S		BASE	2021-10-29	74.7139	Y	N								B	37.2	71	18	149/74	150	60	26.6	3.84	13.6	4.52	150	37.2	53.9	41	53	0.6	103.87	4.2	234	45	169	100	91	6.2	27.12	0.93	14.1	241
19334074	RA-13-C	M	1960-10-21	C/C	1	screening、Visit1	S		BASE	2021-11-04	61.0361	Y	N								C	36.8	79	18	156/103	179.6	87.3	27	5.31	14.1	4.75	255	69.6	16.9	37	49	1	80.74	7.9	181	48	113	215	112	5.9	14.3	<0.60	5.5	400
20080496	RA-15-A	M	1972-07-07	C/C	1	screening、Visit1	S		BASE	2021-11-11	49.3444	Y	N								A	36.6	79	17	124/78	177.2	82.1	26.1	8.48	16.6	5.28	307	63.2	28.5	95	211	0.9	95.33	7.6	186	35	126	191	102	6	16.38	0.88	6.8	308
18959526	RA-16-B	M	1960-06-02	C/C	1	screening、Visit1	S		BASE	2021-11-18	61.4611	Y	N								B	36.9	81	18	134/97	169.6	65.4	22.7	6.28	15.6	4.87	277	42.6	32	41	51	1	80.74	7	210	58	133	194	107	6.3	12.83	1.37	3.3	225
61648838	RA-17-C	M	1970-09-26	C/T	1	screening、Visit1	S		BASE	2022-01-04	51.2722	Y	N								C	36.5	70	18	118/71	179.5	77.7	24.1	5.82	14.7	5.32	179	48.6	42.4	30	53	0.9	94.55	5.6	181	37	128	117	99	5.9	7.41	0.83	4.6	380
15835125	RA-18-A	M	1970-02-18	C/C	1	screening、Visit1	S		BASE	2022-01-05	51.8806	Y	N								A	36.5	66	18	118/75	170	85.2	29.4	8.68	13.5	6.84	265	70.8	21.8	23	48	1	83.73	7.5	147	44	102	82	111	6.4	5.22	0.61	3.5	242
20143795	RA-19-C	M	1955-09-01	C/C	1	screening、Visit1				2022-01-17	66										C	36.6	73	16	129/83	165.8	79.8	29	4.12	14.2	4.57	247	38.6	47.1	59	65	0.8	102.8	4.7	126	42	72	181	93	6	10.5	0.67	3.3	298
15580216	RA-20-D	M	1970-12-09	C/C	1	screening、Visit1				2022-01-20	51										D	36	75	17	120/79	173.5	86.2	28.6	5.99	15.6	4.99	287	38.5	46.2	40	54	1.1	75.01	6.6	170	41	112	186	91	5.7	10.29	<0.60	12.1	326
40987968	RA-22-B	M	1969-12-09	C/C	1	screening、Visit1				2022-02-18	59										B	36.8	72	18	134/85	169.3	70.5	24.5	6.04	19.1	6.47	210	58.4	33.3	37	63	1.1	72.82	4.6	213	39	155	199	129	6.2	16.77	2.02	7	383
72168762	RA-23-A	M	1966-11-06	C/C	1	screening、Visit1				2022-02-22	55										A	36.3	82	16	135/89	165	81.3	29.8	5.26	14.8	4.8	229	69.2	21.1	58	52	1	82.46	6	182	61	119	79	123	6.4	20.64	0.61	7.9	317
20531834	RA-24-B	M	1986-08-12	C/C	1	screening、Visit1				2022-02-23	38										B	36.7	77	17	141/78	179.1	99.4	30.9	6.1	15.3	5.28	281	50.2	37	36	53	1	88.88	7.2	133	27	71	274	93	5.9	15.85	<0.60	5.3	333
16802573	RA-25-D	M	1967-10-07	C/C	1	screening、Visit1				2022-02-23	54										D	36.2	53	17	142/93	170.4	73.9	25.4	6.83	14.6	4.9	252	55.2	35.9	30	50	0.9	93.46	6.3	184	46	127	124	94	6.1	4.96	1.58	4.3	323
61581519	RA-26-A	M	1969-12-09	C/C	1	screening、Visit1				2022-02-25	52										A	36.7	78	19	138/87	169	88.9	31.1	5.73	16.5	5.25	265	55	32.5	34	60	1	83.4	4.8	185	57	133	149	107	6.1	19.39	1.75	5.7	371
14687432	RA-27-C	M	1975-02-15	C/C	1	screening、Visit1				2022-03-01	47										C	36.8	103	21	158/108	171	103.4	35.3	9.39	16.4	5.54	261	62.4	28.3	53	77	1	85.13	8	144	38	93	112	100	5.3	24.93	9.2	10.1	399
61643295	RA-28-D	M	1978-08-01	C/C	1	screening、Visit1				2022-03-01	43										D	36.6	68	15	112/63	181.2	93.1	28.3	6.85	15	4.81	224	55.3	31.1	42	92	1.1	77.65	7.6	203	49	151	149	96	5.6	13.46	0.82	5.9	371
61930267	RA-29-B	M	1956-02-27	C/C	1	screening、Visit1				2022-03-02	65										B	36.6	77	17	146/78	166.8	75	26.9	5.58	15	4.85	238	57.7	33.7	34	66	0.9	90.01	6.8	229	42	148	274	142	6.8	13.6	0.79	6	322
76231564	RA-30-A	F	1960-05-22	C/C	1	screening、Visit1				2022-03-03	61										A	36.8	70	16	135/75	148.8	55	24.8	4.87	15	5.27	303	57.2	35.9	22	27	0.5	133.32	4.9	190	56	133	101	141	6.8	44.01	0.67	3.3	287
61630657	RA-31-D	F	1985-09-27	C/C	1	screening、Visit1				2022-03-07	36										D	36.5	78	18	130/74	157.8	65.1	26.1	10.7	13.5	4.43	340	76.6	17.6	14	12	0.7	100.63	4.7	180	63	114	80	99	5.3	17.91	1.33	4.4	258
18900726	RA-32-C	M	1975-06-22	T/T	1	screening、Visit1				2022-03-07	46										C	36.5	66	19	131/81	173.6	84.9	28.1	6.69	15.1	4.88	229	66.4	25.1	51	51	0.9	96.56	missing	184	57	117	105	98	5.6	4.47	1.71	5	275
20539016	RA-33-C	M	1963-11-10	C/C	1	screening、Visit1				2022-03-08	58										C	36.3	73	18	129/84	169	81	28.3	5.52	15.6	7.08	184	59.2	32.1	35	48	1.1	73.08	3.5	178	41	119	199	99	6.3	12.7	<0.60	4.2	287
30439721	RA-34-D	M	1968-05-17	T/T	1	screening、Visit1				2022-03-14	53										D	36.3	74	18	136/84	182	85.5	25.8	6.56	16.3	5.4	245	63	26.4	31	54	1	83.08	1	208	44	139	233	116	6.3	16.72	0.79	6.5	366
41457285	RA-35-B	F	1976-07-13	C/C	1	screening、Visit1				2022-03-16	45										B	36.5	93	17	148/88	160.3	82.5	32.1	8.56	14.4	4.57	363	66.4	26.4	24	26	0.7	96.18	5.8	198	52	129	235	107	5.4	31.98	5.32	4.1	275
50375494	RA-36-A	M	1965-12-25	C/T	1	screening、Visit1				2022-03-29	56										A	36.8	90	20	165/103	173	103.6	34.6	10.54	17.2	6.02	241	57.6	29.4	58	87	1.4	55.72	7.3	215	47	156	241	135	6.6	95.9	2.85	12.7	363
20539454	RA-37-B	M	1984-03-23	C/C	1	screening、Visit1				2022-04-07	38										B	36.6	77	19	132/81	171.4	100.4	34.1	9.75	14.9	4.99	341	54	37.4	19	31	1	88.88	4.7	153	21	70	536	84	5.6	15.41	3.5	4.7	372
18814633	RA-38-D	F	1959-11-14	C/C	1	screening、Visit1				2022-04-12	62										D	36.1	80	18	130/78	151	56.2	24.6	5.38	13.9	4.56	252	44	46.1	18	17	0.6	107.67	5.6	246	69	175	122	108	6	7.7	1.85	3	237
20146904	RA-39-C	F	1963-07-19	C/C	1	screening、Visit1				2022-04-12	58										C	36	74	19	128/74	155	70	29.1	6.24	13.6	4.42	221	48.8	41	24	19	0.7	91.35	5	159	51	101	78	96	6	10.22	1.59	4.4	249
16797162	RA-40-D	M	1973-12-22	C/T	1	screening、Visit1				2022-04-14	48										D	36.2	82	16	150/89	182.2	99	29.8	6.73	15.7	5.04	201	53.1	38.5	43	75	1.1	75.94	8.1	209	33	162	175	92	5.7	26.55	1.35	7.5	364
17735403	RA-41-A	M	1958-10-03	C/T	1	screening、Visit1				2022-04-14	63										A	36.5	77	17	150/88	165	59.5	21.8	6.02	15.7	5.05	185	52.2	39.4	19	29	0.8	103.77	5.2	158	39	113	99	114	5.9	6.31	<0.60	3.5	233
41180761	RA-42-A	F	1978-09-04	C/C	1	screening、Visit1				2022-04-15	43										A	36.6	82	18	124/76	167	79	28.3	9.07	13.3	4.29	318	63.2	28.3	17	22	0.5	143.12	4.3	168	50	114	111	117	6.1	9.22	14.28	2.8	348
41524219	RA-43-D	M	1987-03-24	C/C	1	screening、Visit1				2022-04-18	35										D	36.4	79	18	143/83	167	101	36.2	9.26	16.5	5.58	260	56.2	35.4	89	159	0.9	102.06	6.9	222	39	147	195	88	5.6	17.96	5.86	5.8	400
61102431	RA-44-B	F	1962-03-15	C/C	1	screening、Visit1				2022-04-18	60										B	36.7	66	18	142/80	145.4	56.4	26.6	6.42	13.8	4.54	196	53.5	38.9	23	37	0.6	108.38	4	170	51	108	159	106	6	9.53	2.47	3.6	286
41013199	RA-45-C	F	1966-01-11	C/T	1	screening、Visit1				2022-04-20	56										C	36.3	72	17	151/85	153	52.5	22.4	5.15	13	3.98	197	44.3	47.4	32	33	0.6	109.91	3.9	148	44	94	108	90	5.7	4.82	1.64	5.8	296
35769426	RA-46-A	M	1955-01-05	C/C	1	screening、Visit1				2022-04-21	67										A	36.5	69	16	151/86	162.7	62.8	23.7	4.96	13.7	4.77	295	50.5	40.9	15	28	0.9	89.46	5.7	219	42	161	171	106	6.4	4.58	1.36	3.8	298
20200949	RA-47-C	M	1978-01-04	C/T	1	screening、Visit1				2022-05-03	44										C	36.2	69	16	130/82	170	66.5	23	7.32	16.4	5.36	232	65.5	23.1	33	56	0.9	97.43	5.7	213	43	158	105	102	5.9	16.4	1.53	5.6	395
19303713	RA-48-B	M	1975-03-15	C/T	1	screening、Visit1				2022-05-24	47										B	36.2	90	17	159/90	168	81.7	28.9	8.01	15.1	5.3	300	57	35	54	80	1	85.13	6.3	203	31	134	383	87	5.4	19.2	1.55	10.5	299
61245247	RA-49-B	M	1978-12-20	C/T	1	screening、Visit1				2022-06-02	43										B	36.1	74	16	158/97	170	91	31.4	6.8	17.4	5.75	192	54.6	33.5	41	85	0.9	97.89	6.5	175	61	106	91	121	6.2	14	1.39	5.7	338
60529165	RA-50-D	M	1946-10-12	C/T	1	screening、Visit1				2022-06-07	75										D	36.5	77	19	148/79	168	88.6	31.3	6.56	13.5	4.38	269	51.2	40.7	61	47	1.1	69.36	4.9	188	50	126	122	77	5.8	9.3	2.96	5.4	370
30608882	RA-51-B	M	1970-09-01	C/C	1	screening、Visit1				2022-07-08	51										B	36.4	97	17	144/90	168	85	30.1	5.59	14.4	4.93	333	38	46	90	184	1	83.73	8.1	241	61	158	133	102	6	14.4	0.95	7.8	369
41391163	RA-52-A	M	1965-09-03	C/C	1	screening、Visit1				2022-07-13	56										A	36.1	87	18	162/99	165	79.1	29	5.17	15.4	5.23	196	60.8	26.7	31	50	1.1	73.6	5.9	180	35	130	143	109	5.8	19.3	1.42	15.2	353
28339988	RA-53-D	M	1975-03-26	C/C	1	screening、Visit1				2022-07-26	47										D	36.6	74	18	125/73	175.9	91.5	29.5	6.01	14	5.1	272	68.1	22.8	28	48	0.9	96.13	8	205	47	145	190	99	6.1	21	4.14	6	342
61622197	RA-54-C	M	1985-07-11	C/C	1	screening、Visit1				2022-08-02	37										C	36.2	66	17	109/66	182	75.6	22.8	2.57	14.3	4.04	176	47.5	38.5	82	70	0.8	115.61	7.6	160	84	63	167	82	4.6	2.23	0.61	3.2	287
47029914	RA-55-A	M	1991-02-09	C/T	1	screening、Visit1				2022-08-04	31										A	36.6	73	18	133/73	178	100	31.5	4.54	15.4	5.15	231	52.7	39.4	65	121	1.1	82.98	8	171	28	75	549	95	5.8	21.5	0.9	9.6	386
20147993	RA-56-B	M	1999-11-20	C/T	1	screening、Visit1				2022-08-04	22										B	36.7	61	18	141/73	176	86.3	27.8	7.03	15.3	5.29	283	46.7	44.8	145	250	0.8	128.48	8.3	337	38	270	200	103	7.1	41.8	1.22	10.3	319
30666740	RA-57-C	F	1971-07-22	C/C	1	screening、Visit1				2022-08-15	51										C	36.3	65	18	105/65	157	70.3	28.5	4.3	14.4	4.59	266	50.4	42.6	21	22	0.7	93.76	4.5	200	52	147	60	99	5.7	12.4	<0.60	5.5	243
26092179	RA-58-A	F	1958-03-10	C/C	1	screening、Visit1				2022-08-15	64										A	36.1	87	17	132/74	163.4	84.5	31.6	5.23	15.6	5.1	193	52.2	37.7	21	28	1	59.33	5.9	152	66	77	90	99	5.9	11.3	1.39	6.8	297
17618458	RA-60-D	F	1957-10-30	C/C	1	screening、Visit1				2022-09-05	64										D	36.6	99	19	139/91	152.4	69.8	30	6.66	13.7	4.05	238	75.2	18.5	24	40	0.6	106.97	3.8	233	64	159	87	102	5.8	9.32	24.06	4	328
19342620	RA-61-D	M	1961-12-02	C/C	1	screening、Visit1				2022-09-15	60										D	36.3	77	19	130/76	180	121.4	37.4	5.3	13.3	4.1	233	65.5	23	31	55	1.2	65.64	5.8	164	44	95	166	96	5.6	18.3	0.78	6.3	400
10003765	RA-62-A	M	1978-08-12	C/C	1	screening、Visit1				2022-09-23	44										A	37	93	19	142/92	166	134.2	48.7	11.07	16.2	5.58	374	65.1	25.3	12	22	0.8	111.62	7.4	236	45	165	171	103	6.2	25	8.53	7.8	298
50710718	RA-63-C	M	1959-09-01	C/C	1	screening、Visit1				2022-09-27	63										C	36.5	85	18	133/75	174	79.1	26.1	6.69	15.4	4.83	188	63.5	29	19	30	1	80.21	4.6	180	64	115	53	112	5.8	19.5	<0.60	4	247
35429403	RA-64-B	F	1964-03-03	C/C	1	screening、Visit1				2022-09-30	58										B	36.3	88	18	123/75	160	73	28.5	7.22	14.7	4.82	265	76	17.3	20	29	0.7	91.35	5.4	185	59	90	285	92	5.7	21.6	15	3.1	281
15058943	RA-01-D	F	1954-01-28	C/C	2	Visit2(w4)	S		BASE	2021-10-20	67.7278	Y	N								D	36.9	61	20	161/95	159	68.3	27							51	65	0.8	75.81	5.7	239	62	168	138	102
20324286	RA-02-C	M	1964-04-13	C/C	2	Visit2(w4)	S		BASE	2021-10-16	57.4444	Y	N								C	36.6	71	18	118/78	173	83.8	27.9							35	64	0.9	92.44	6.2	202	45	131	234	139
20088899	RA-03-C	M	1984-01-21	C/C	2	Visit2(w4)	S		BASE	2021-10-27	37.7667	Y	N								C	36.5	81	18	139/92	181	113.7	34.7							30	57	0.9	100.92	7	210	49	147	146	92
12788461	RA-04-A	M	1974-05-14	C/C	2	Visit2(w4)	S		BASE	2021-10-25	47.4472	Y	N								A	36.8	83	12	167/117	168	97.2	34.4							79	162	0.7	128.48	6.1	175	46	116	75	86
61324299	RA-05-D	M	1970-10-27	C/T	2	Visit2(w4)	S		BASE	2021-10-30	51.0083	Y	N								D	36.7	68	14	148/96	170	117.5	40.6							36	63	1.2	68.12	6.7	198	36	147	85	92
20153903	RA-06-A	M	1966-12-02	C/C	2	Visit2(w4)	S		BASE	2021-11-03	54.9194	Y	N								A	36.5	82	17	137/92	164.2	59.5	22							42	105	1	82.76	7.3	204	45	149	108	108
16174459	RA-07-D	F	1942-10-05	C/C	2	Visit2(w4)	S		BASE	2021-11-09	79.0944	Y	N								D	37.4	73	16	146/83	154.1	54.2	22.8							53	70	0.8	73.54	4.4	175	58	117	96	121
76198455	RA-09-B	M	1973-03-17	C/T	2	Visit2(w4)	S		BASE	2021-11-17	48.6667	Y	N								B	37	83	17	127/80	178	83.8	26.4							47	60	0.8	109.66	7.6	194	51	127	200	96
19710025	RA-10-A	F	1959-09-03	C/C	2	Visit2(w4)	S		BASE	2021-11-17	62.2056	Y	N								A	36.4	64	16	119/70	151.6	58.5	25.4							60	87	0.8	77.25	5.3	186	65	115	87	81
18253119	RA-11-C	M	1965-09-25	C/C	2	Visit2(w4)	S		BASE	2021-11-20	56.1528	Y	N								C	36.2	73	16	113/77	171.5	78.6	26.7							50	96	0.9	92.78	5.5	176	55	113	70	108
19374548	RA-12-B	F	1947-02-12	C/T	2	Visit2(w4)	S		BASE	2021-11-30	74.8	Y	N								B	36.9	63	18	142/81	150	59.7	26.5							38	48	0.6	103.87	4.2	153	48	96	72	93
19334074	RA-13-C	M	1960-10-21	C/C	2	Visit2(w4)	S		BASE	2021-12-01	61.1111	Y	N								C	36.1	76	18	165/103	179.6	86.8	26.9							30	44	1	80.74	7.1	179	50	108	249	108
20080496	RA-15-A	M	1972-07-07	C/C	2	Visit2(w4)	S		BASE	2021-12-11	49.4278	Y	N								A	36.5	79	16	119/73	177.2	80	25.4							47	92	1	84.41	8.7	181	35	127	157	104
18959526	RA-16-B	M	1960-06-02	C/C	2	Visit2(w4)	S		BASE	2021-12-16	61.4611	Y	N								B	36.9	77	18	130/89	169.6	64.9	22.5							27	30	0.9	91.18	7.5	165	51	90	165	91
61648838	RA-17-C	M	1970-09-26	C/T	2	Visit2(w4)	S		BASE	2022-02-07	51.3639	Y	N								C	36.6	79	18	118/69	179.5	79.2	24.5							28	48	0.8	108.32	5.6	160	35	113	131	97
15835125	RA-18-A	M	1970-02-18	C/C	2	Visit2(w4)	S		BASE	2022-02-10	51.9778	Y	N								A	36.5	72	18	120/68	170	84.1	29.1							24	39	1	83.73	7.6	123	42	75	61	99
20143795	RA-19-C	M	1955-09-01	C/C	2	Visit2(w4)				2022-02-14	66										C	36.3	71	17	127/76	165.8	79.7	28.9							40	48	0.8	102.8	6	137	48	81	154	93
15580216	RA-20-D	M	1970-12-09	C/C	2	Visit2(w4)				2022-02-15	51										D	36.9	82	18	133/77	173.5	89	29.5							33	43	1	83.73	6.5	182	46	124	170	105
40987968	RA-22-B	M	1969-12-09	C/C	2	Visit2(w4)				2022-03-21	59										B	36.4	81	17	139/86	169.3	70.8	24.7							25	42	0.9	91.8	5	177	38	115	202	110
72168762	RA-23-A	M	1966-11-06	C/C	2	Visit2(w4)				2022-03-22	55										A	36.6	82	16	138/95	165	79.3	29.1							37	42	1.1	73.87	5	170	57	112	69	117
20531834	RA-24-B	M	1986-08-12	C/C	2	Visit2(w4)				2022-03-21	38										B	36.7	76	17	118/78	179.1	97.8	30.4							41	100	0.8	114.99	8.1	161	35	89	267	99
16802573	RA-25-D	M	1967-10-07	C/C	2	Visit2(w4)				2022-03-30	54										D	36.6	56	17	133/87	170.4	73.2	25.1							25	29	0.9	93.46	5.3	171	44	122	93	92
61581519	RA-26-A	M	1969-12-09	C/C	2	Visit2(w4)				2022-03-24	52										A	36.2	82	18	149/87	169	87.7	30.7							20	26	1.1	74.71	5.7	111	48	52	104	91
14687432	RA-27-C	M	1975-02-15	C/C	2	Visit2(w4)				2022-03-30	47										C	36.8	81	20	151/104	171	100	34.1							44	63	0.9	96.13	6.5	153	38	101	129	90
61643295	RA-28-D	M	1978-08-01	C/C	2	Visit2(w4)				2022-03-29	43										D	36.5	70	15	99/55	181.2	91.7	27.9							27	46	1	86.68	8.3	183	42	132	68	91
61930267	RA-29-B	M	1956-02-27	C/C	2	Visit2(w4)				2022-03-30	65										B	36.6	95	18	147/89	166.8	72.7	26.1							30	50	1	79.71	7.1	209	40	143	257	116
76231564	RA-30-A	F	1960-05-22	C/C	2	Visit2(w4)				2022-03-31	61										A	36.8	70	16	132/78	148.8	54.5	24.6							21	23	0.5	133.32	5.5	216	58	136	201	138
61630657	RA-31-D	F	1985-09-27	C/C	2	Visit2(w4)				2022-04-07	36										D	36.2	76	16	120/72	157.8	64.8	26							18	13	0.7	100.63	4.5	167	57	109	76	98
18900726	RA-32-C	M	1975-06-22	T/T	2	Visit2(w4)				2022-04-08	46										C	36.5	67	18	132/74	173.6	84.5	28							27	30	1	85.5	5.4	207	58	136	169	88
20539016	RA-33-C	M	1963-11-10	C/C	2	Visit2(w4)				2022-04-06	58										C	36.5	96	18	120/76	169	80	28							22	29	1.1	73.08	3.1	163	33	100	221	98
30439721	RA-34-D	M	1968-05-17	T/T	2	Visit2(w4)				2022-04-11	53										D	36.5	76	18	134/79	182	84.7	25.5							34	55	1	83.08	1	191	40	128	239	101
41457285	RA-35-B	F	1976-07-13	C/C	2	Visit2(w4)				2022-04-13	45										B	36.5	93	18	141/80	160.3	82.3	32							23	26	0.7	96.18	7	178	52	113	244	99
50375494	RA-36-A	M	1965-12-25	C/T	2	Visit2(w4)				2022-04-26	56										A	36.6	91	21	169/115	173	103.2	34.4							64	83	1.3	60.69	7.1	227	46	155	244	95
20539454	RA-37-B	M	1984-03-23	C/C	2	Visit2(w4)				2022-05-05	38										B	36.6	83	18	121/73	171.4	100	34							17	41	0.9	100.37	4.6	135	24	65	471	89
18814633	RA-38-D	F	1959-11-14	C/C	2	Visit2(w4)				2022-05-10	62										D	36.5	68	18	109/71	151	55.4	24.2							17	16	0.6	107.67	6.2	239	71	160	140	99
20146904	RA-39-C	F	1963-07-19	C/C	2	Visit2(w4)				2022-05-10	58										C	36.3	68	18	129/76	155	68.4	28.4							23	19	0.8	78.3	4.7	169	53	107	101	83
16797162	RA-40-D	M	1973-12-22	C/T	2	Visit2(w4)				2022-40-D	48										D	36.5	82	17	143/93	182.2	99.1	29.8							43	90	1.1	75.94	7.6	223	35	170	139	96
17735403	RA-41-A	M	1958-10-03	C/T	2	Visit2(w4)				2022-05-12	63										A	36.2	76	17	128/82	165	60	22							19	26	0.8	103.77	6	156	41	99	142	105
41180761	RA-42-A	F	1978-09-04	C/C	2	Visit2(w4)				2022-05-12	43										A	36.5	81	17	125/78	167	78	27.9							30	35	0.5	143.12	3.9	160	48	99	107	108
41524219	RA-43-D	M	1987-03-24	C/C	2	Visit2(w4)				2022-05-23	35										D	36.5	89	18	141/85	167	103.8	37.2							130	240	0.7	136.4	6	208	41	144	159	93
61102431	RA-44-B	F	1962-03-15	C/C	2	Visit2(w4)				2022-05-23	60										B	36.6	66	18	117/66	145.4	55.8	26.3							19	31	0.6	108.38	4.4	136	43	67	222	98
41013199	RA-45-C	F	1966-01-11	C/T	2	Visit2(w4)				2022-05-20	56										C	36.5	75	17	149/87	153	52.7	22.5							24	17	0.6	109.91	3.7	145	44	80	146	90
35769426	RA-46-A	M	1955-01-05	C/C	2	Visit2(w4)				2022-05-18	67										A	36.5	65	16	134/85	162.7	61.9	23.3							13	13	1	79.22	5.1	209	45	157	97	103
20200949	RA-47-C	M	1978-01-04	C/T	2	Visit2(w4)				2022-05-30	44										C	36.4	80	16	130/71	170	66.9	23.1							33	55	1	86.28	6.2	209	35	148	211	104
19303713	RA-48-B	M	1975-03-15	C/T	2	Visit2(w4)				2022-06-21	47										B	36	104	18	165/93	168	81.3	28.8							50	61	1	85.13	7.8	204	33	119	484	85
61245247	RA-49-B	M	1978-12-20	C/T	2	Visit2(w4)				2022-06-30	43	B									B	36.3	84	16	145/96	170	90.6	31.3							42	106	0.9	97.89	5.7	158	54	99	91	105
60529165	RA-50-D	M	1946-10-12	C/T	2	Visit2(w4)				2022-07-05	75										D	36.6	91	18	154/85	168	89.6	31.7							37	67	0.9	87.43	4	194	57	123	120	81
30608882	RA-51-B	M	1970-09-01	C/C	2	Visit2(w4)				2022-08-04	51										B	36.2	98	17	137/86	168	83.5	29.5							41	89	0.9	94.55	7.2	212	57	138	134	92
41391163	RA-52-A	M	1965-09-03	C/C	2	Visit2(w4)				2022-08-10	56										A	36.2	85	18	157/109	165	78.9	28.9							35	46	1	82.15	5.9	166	35	118	139	99
28339988	RA-53-D	M	1975-03-26	C/C	2	Visit2(w4)				2022-08-23	47										D	36.1	83	18	134/76	175.9	92.2	29.7							25	34	0.9	96.13	7.7	190	40	119	261	89
61622197	RA-54-C	M	1985-07-11	C/C	2	Visit2(w4)				2022-08-30	37										C	36	68	17	94/51	182	75.8	22.8							47	39	1.1	80.06	6	196	104	83	117	85
47029914	RA-55-A	M	1991-02-09	C/T	2	Visit2(w4)				2022-09-01	31										A	36.6	71	18	130/76	178	97	30.6							42	86	1	92.63	7.7	182	26	65	853	84
20147993	RA-56-B	M	1999-11-20	C/T	2	Visit2(w4)				2022-09-01	22										B	36.5	68	18	148/84	176	84.9	27.4							39	127	0.9	112.15	5.1	276	38	218	101	87
30666740	RA-57-C	F	1971-07-22	C/C	2	Visit2(w4)				2022-09-14	51										C	36.1	63	18	112/69	157	70.2	28.4							21	19	0.6	112.02	5.4	193	58	134	70	91
26092179	RA-58-A	F	1958-03-10	C/C	2	Visit2(w4)				2022-09-14	64										A	36.1	88	17	145/95	163.4	81.7	30.5							19	20	0.9	67	5.9	155	64	80	93	92
17618458	RA-60-D	F	1957-10-30	C/C	2	Visit2(w4)				2022-10-04	64										D	36.5	81	18	145/83	152.4	70.8	30.4							32	45	0.5	131.61	4.4	221	63	157	81	101
19342620	RA-61-D	M	1961-12-02	C/C	2	Visit2(w4)				2022-10-19	60										D	36.5	70	19	133/82	180	118.6	36.6							26	53	1	81.01	5.6	131	44	66	156	97
10003765	RA-62-A	M	1978-08-12	C/C	2	Visit2(w4)				2022-10-20	44										A	36.7	91	19	147/94	166	132.1	47.9							13	32	0.9	97.43	7.1	191	39	128	175	102
50710718	RA-63-C	M	1959-09-01	C/C	2	Visit2(w4)				2022-10-22	63										C	36.2	76	18	118/60	174	77.8	25.6							26	25	1.1	71.86	4	177	63	110	52	101
35429403	RA-64-B	F	1964-03-03	C/C	2	Visit2(w4)				2022-10-29	58										B	36.2	84	18	114/66	160	74.9	29.2							22	27	0.6	109.13	6.2	218	52	141	194	100
15058943	RA-01-D	F	1954-01-28	C/C	3	Visit3(w12)	S		BASE	2021-12-16	67.8833	Y	N								D	36.9	68	20	133/81	159	68.4	27	4.95	14.1	4.52	155	57.2	33.7	51	72	0.8	75.81	6.3	239	60	169	130	101	5.6		1.28	6.1	256
20324286	RA-02-C	M	1964-04-13	C/C	3	Visit3(w12)	S		BASE	2021-12-11	57.4444	Y	N								C	36.8	72	18	133/87	173	84	28	7.34	16.3	5.41	305	54.4	33.1	31	59	0.8	105.9	6.3	190	43	122	170	122	6.8		1.86	7.5	343
20088899	RA-03-C	M	1984-01-21	C/C	3	Visit3(w12)	S		BASE	2021-12-16	37.9028	Y	N								C	36.5	94	18	148/89	181	112.4	34.3	7.78	15.6	5.06	284	55.6	38.2	24	44	0.8	115.61	6.5	216	52	147	180	93	5.4		3.23	8.3	393
12788461	RA-04-A	M	1974-05-14	C/C	3	Visit3(w12)	S		BASE	2021-12-20	47.4472	Y	N								A	36.7	85	14	167/113	168	95.6	33.8	6.75	16.8	5.31	277	55.4	35.7	74	149	0.8	110.13	5.9	169	47	112	83	95	5.9		2.11	15.3	339
61324299	RA-05-D	M	1970-10-27	C/T	3	Visit3(w12)	S		BASE	2021-12-25	51.1611	Y	N								D	36.5	85	14	153/91	170	106	36.6	4.11	14.1	4.48	156	65.6	26.8	19	21	0.9	94.93	7.3	217	47	162	78	102	5.3		1.1	17	299
20153903	RA-06-A	M	1966-12-02	C/C	3	Visit3(w12)	S		BASE	2021-12-29	55.075	Y	N								A	36.8	76	18	123/83	164.2	58.8	21.8	5.67	16.5	5.49	214	61.7	32.8	35	82	0.8	107.07	7	194	43	140	121	99	5.6		0.64	5.5	383
16174459	RA-07-D	F	1942-10-05	C/C	3	Visit3(w12)	S		BASE	2022-01-04	79.2472	Y	N								D	37.2	74	16	161/81	154.1	53.6	22.5	5.64	16	5.18	209	57.3	34.8	54	65	0.7	85.79	4.7	178	60	116	71	125	6.2		0.85	4.7	242
76198455	RA-09-B	M	1973-03-17	C/T	3	Visit3(w12)	S		BASE	2022-01-12	48.8194	Y	N								B	36.8	86	18	109/62	178	84	26.5	6.9	15	4.63	250	68.2	24.5	32	45	0.7	127.93	7.8	174	55	108	170	94	5.9		<0.60	10.2	391
19710025	RA-10-A	F	1959-09-03	C/C	3	Visit3(w12)	S		BASE	2022-01-17	62.3722	Y	N								A	36.5	77	16	140/78	151.6	58.85	25.6	7.7	13.9	4.81	327	60.1	31.9	48	65	0.8	77.25	4.2	185	69	114	81	91	6		1.36	5.3	345
18253119	RA-11-C	M	1965-09-25	C/C	3	Visit3(w12)	S		BASE	2022-01-15	56.3056	Y	N								C	36.3	79	15	133/93	171.5	80.1	27.2	7.56	16.6	5.33	270	54.9	31.2	68	150	0.9	92.78	6.1	190	62	122	88	119	6.2		<0.60	6.1	320
19374548	RA-12-B	F	1947-02-12	C/T	3	Visit3(w12)	S		BASE	2022-01-17	74.9306	Y	N								B	36.9	74	17	151/83	150	58.95	26.2	4.39	12.7	4.17	170	38	52.6	42	55	0.6	103.87	4.6	182	57	116	83	94	5.7		0.9	13.4	199
19334074	RA-13-C	M	1960-10-21	C/C	3	Visit3(w12)	S		BASE	2022-01-25	61.2611	Y	N								C	36.4	78	18	143/95	179.6	86.5	26.8	4.67	13.9	4.75	277	62.5	22.7	29	43	1	80.74	7.4	181	47	114	212	104	5.8		<0.60	4.5	348
20080496	RA-15-A	M	1972-07-07	C/C	3	Visit3(w12)	S		BASE	2022-01-29	49.4278	Y	N								A	36.5	79	17	134/90	177.2	80.6	25.6	8.17	15.8	5.18	305	63.6	29.6	23	46	0.8	109.2	7.1	168	39	123	150	97	5.7		0.65	6	287
18959526	RA-16-B	M	1960-06-02	C/C	3	Visit3(w12)	S		BASE	2022-02-10	61.4611	Y	N								B	36.7	74	18	124/87	169.6	65.2	22.6	8.24	14.6	4.56	274	48.9	28.4	29	32	1	80.74	7.7	193	59	121	146	101	5.7		1.29	4.1	208
61648838	RA-17-C	M	1970-09-26	C/T	3	Visit3(w12)				2022-03-28	51										C	36.5	67	17	116/72	179.5	77.6	24	5.94	14.1	5.12	181	44.8	47.1	33	56	0.7	126.37	5.8	157	41	108	102	98	5.7		0.96	4.4	331
15835125	RA-18-A	M	1970-02-18	C/C	3	Visit3(w12)				2022-04-07	52										A	36.7	62	18	115/70	170	83.1	28.7	6.26	12.8	6.55	258	60.7	31.3	22	30	1	83.73	7.6	143	38	93	81	99	6		<0.60	3.9	286
20143795	RA-19-C	M	1955-09-01	C/C	3	Visit3(w12)				2022-04-06	66										C	36.4	62	16	129/80	165.8	79.7	28.9	4	14	4.53	248	44.4	43.5	44	58	0.7	119.92	4.7	132	47	78	93	93	5.7		<0.60	4.7	265
15580216	RA-20-D	M	1970-12-09	C/C	3	Visit3(w12)				2022-04-12	51										D	36.2	82	18	132/89	173.5	90	29.8	5.63	16.1	5.08	280	51	40.1	34	49	1	83.73	6.6	177	49	112	133	107	5.9		0.89	10.3	328
40987968	RA-22-B	M	1969-12-09	C/C	3	Visit3(w12)				2022-05-17	59										B	36.5	73	18	138/88	169.3	68.8	24	6.25	18.6	6.35	210	60.2	31.5	30	46	1	81.29	4.9	216	39	153	231	104	5.8		2.37	7.9	363
72168762	RA-23-A	M	1966-11-06	C/C	3	Visit3(w12)				2022-05-17	55	A									A	36.3	79	15	121/78	165	75.4	27.6	4.72	14.1	4.43	182	68.8	21.6	41	45	0.9	93.12	4.5	143	44	93	81	106	5.6		7.2	5.2	301
20531834	RA-24-B	M	1986-08-12	C/C	3	Visit3(w12)				2022-05-17	38										B	36.6	79	18	134/79	179.1	95.8	29.8	6.4	14.9	5.14	259	50.7	35.9	61	165	0.8	114.99	9.1	194	32	93	583	90	5.5		<0.60	4.6	299
16802573	RA-25-D	M	1967-10-07	C/C	3	Visit3(w12)				2022-05-12	54										D	36.6	60	16	128/87	170.4	71.8	24.7	5.87	13.8	4.73	256	55.2	35.4	24	25	0.9	93.46	6.1	150	42	99	125	95	5.7		1.53	4.5	266
61581519	RA-26-A	M	1969-12-09	C/C	3	Visit3(w12)				2022-05-19	52										A	36.4	78	19	147/94	169	85	29.7	5.68	15.1	4.73	284	58.4	32.2	17	21	1.1	74.71	8.3	162	44	107	93	102	5.8		22.33	5.8	288
14687432	RA-27-C	M	1975-02-15	C/C	3	Visit3(w12)				2022-05-26	47										C	36.6	95	20	143/95	171	99.4	33.9	7.15	16.9	5.71	207	68	22.5	41	63	0.9	96.13	6.6	133	36	87	112	96	5.1		2.32	10.8	391
61643295	RA-28-D	M	1978-08-01	C/C	3	Visit3(w12)				2022-05-23	43										D	36.5	65	16	107/66	181.2	90.7	27.6	8.12	15	4.89	218	48.5	37.6	25	46	1.1	77.65	7	206	51	147	78	91	5.2		0.89	4.2	373
61930267	RA-29-B	M	1956-02-27	C/C	3	Visit3(w12)				2022-05-31	65										B	36.4	77	19	125/78	166.8	71	25.5	4.69	10.6	3.57	351	65.4	25.8	26	35	0.9	90.01	6.5	190	40	118	249	102	4.7		0.62	5	286
76231564	RA-30-A	F	1960-05-22	C/C	3	Visit3(w12)				2022-05-26	61										A	36.7	71	16	131/77	148.8	55	24.8	6.64	15	5.18	278	62.6	29.2	29	37	0.6	108.02	5.5	222	60	153	183	117	6.4		0.69	3.4	319
61630657	RA-31-D	F	1985-09-27	C/C	3	Visit3(w12)				2022-05-30	36										D	36.5	71	16	123/81	157.8	66.9	26.8	6.41	13.4	4.39	259	64.7	28.1	17	16	0.6	120.23	5.3	180	62	111	102	95	4.9		0.81	4	272
18900726	RA-32-C	M	1975-06-22	T/T	3	Visit3(w12)				2022-06-02	46										C	36.3	69	18	114/67	173.6	84.3	27.9	5.85	15.4	4.92	200	57.9	32.1	23	24	1	85.5	5.4	189	55	110	136	88	5.9		0.65	4	272
20539016	RA-33-C	M	1963-11-10	C/C	3	Visit3(w12)				2022-05-30	58										C	36.5	82	18	138/87	169	80.6	28.2	5.98	15.1	6.87	213	62.2	28.3	24	32	1	81.57	3	170	34	109	189	94	6.1		<0.60	4.3	245
30439721	RA-34-D	M	1968-05-17	T/T	3	Visit3(w12)				2022-06-06	53										D	36.5	76	18	131/81	182	84	25.3	6.72	16.8	5.56	235	70.6	19.6	32	60	1.1	74.42	1.2	201	41	138	238	119	5.8		0.84	5.8	335
41457285	RA-35-B	F	1976-07-13	C/C	3	Visit3(w12)				2022-06-08	45										B	36.2	94	18	124/69	160.3	79.7	31	8.71	13.4	4.26	317	63.4	28.4	20	24	0.6	114.9	7.3	173	49	106	236	100	4.9		5.99	6.4	362
50375494	RA-36-A	M	1965-12-25	C/T	3	Visit3(w12)				2022-06-21	56										A	36.5	97	21	168/108	173	101.9	34	9.41	16.7	5.82	212	57.1	30.3	78	104	1.3	60.69	6.8	226	46	150	199	92	6.2		1.84	13.2	357
20539454	RA-37-B	M	1984-03-23	C/C	3	Visit3(w12)				2022-06-30	38										B	36.2	73	18	114/74	171.4	94.9	32.3	8.36	14.1	4.8	327	56.6	34.8	20	38	0.9	100.37	5.3	143	22	82	341	82	5.2		3.64	4.9	356
18814633	RA-38-D	F	1959-11-14	C/C	3	Visit3(w12)				2022-07-05	62										D	36.5	71	18	135/79	151	55	24.1	4.14	12.9	4.12	207	46.2	39.1	17	21	0.6	107.67	6.5	231	69	161	105	92	5.9		3.01	2.2	239
20146904	RA-39-C	F	1963-07-19	C/C	3	Visit3(w12)				2022-07-05	58										C	36.2	69	18	132/74	155	67.7	28.1	7.46	13	4.37	225	46.1	44.6	22	19	0.8	78.3	5.1	167	46	100	171	84	6		1.23	3	242
16797162	RA-40-D	M	1973-12-22	C/T	3	Visit3(w12)				2022-07-07	48										D	36.3	82	17	156/96	182.2	99.3	30	5.33	15.9	5.12	194	49.3	40.9	97	166	1.1	75.94	7.7	231	33	191	157	89	5.7		0.97	6.7	357
17735403	RA-41-A	M	1958-10-03	C/T	3	Visit3(w12)				2022-07-07	63										A	36.5	71	17	140/76	165	57.9	21.2	6.47	15.3	4.98	201	53.3	39.9	18	20	0.7	121.06	5.4	153	43	100	91	99	5.9		<0.60	2.6	234
41180761	RA-42-A	F	1978-09-04	C/C	3	Visit3(w12)				2022-07-06	43										A	36.4	82	18	129/72	167	75.8	27.1	10.76	13.7	4.4	349	65.2	26.9	29	38	0.5	143.12	4.5	204	52	129	123	96	5.4		22.48	4	382
41524219	RA-43-D	M	1987-03-24	C/C	3	Visit3(w12)				2022-07-11	35										D	36.2	61	18	139/79	167	98.5	35.3	7.38	15.6	5.33	226	51.4	41.9	47	111	0.9	102.06	7.3	150	37	101	79	72	5.8		1.57	5.7	354
61102431	RA-44-B	F	1962-03-15	C/C	3	Visit3(w12)				2022-07-11	60										B	36.4	74	18	124/74	145.4	55.8	26.3	5.99	13.4	4.52	204	53.5	39.1	27	42	0.6	108.38	4.3	152	51	86	137	96	6		1.11	2.5	326
41013199	RA-45-C	F	1966-01-11	C/T	3	Visit3(w12)				2022-07-14	56										C	36.2	77	18	127/75	153	52.3	22.3	5.89	13.6	4.13	228	53	36.8	30	23	0.6	109.91	5.1	168	48	102	140	101	5.6		2.71	6	295
35769426	RA-46-A	M	1955-01-05	C/C	3	Visit3(w12)				2022-07-11	67										A	36.1	72	16	145/99	162.7	62.2	23.4	5.91	12.9	4.39	256	54.1	37.6	13	14	0.9	89.46	4.9	196	42	143	133	91	6.5		1.12	3.9	247
20200949	RA-47-C	M	1978-01-04	C/T	3	Visit3(w12)				2022-07-30	44										C	36.2	66	16	119/72	170	66.8	23.1	6.81	15.1	5.05	241	68.7	21.4	45	72	0.9	97.43	6	208	39	149	193	115	6		1.49	8	398
19303713	RA-48-B	M	1975-03-15	C/T	3	Visit3(w12)				2022-08-16	47										B	36.1	104	18	165/97	168	80.4	28.4	7.64	15.1	5.3	306	62	29.7	44	53	1.1	76.26	7.7	219	38	145	234	85	5.5		1.73	12.8	325
61245247	RA-49-B	M	1978-12-20	C/T	3	Visit3(w12)				2022-08-25	43	B									B	36.2	70	16	144/100	170	89.3	30.8	6.83	17.4	5.77	180	54.3	35.3	45	105	0.9	97.89	6.7	179	59	112	81	112	6.4		1.43	6.6	337
60529165	RA-50-D	M	1946-10-12	C/T	3	Visit3(w12)				2022-08-30	75										D	36.5	97	18	160/83	168	87.8	31.1	5.63	12.8	4.09	241	54.7	35.2	35	60	1.1	69.36	4.3	171	45	108	141	99	5.7		1.13	3.9	357
30608882	RA-51-B	M	1970-09-01	C/C	3	Visit3(w12)				2022-09-29	51										B	36	96	18	161/95	168	81	28.6	5.61	14.6	4.98	336	38.7	49.2	45	98	1	83.73	7.7	194	51	132	139	82	5.8		0.95	11.8	338
41391163	RA-52-A	M	1965-09-03	C/C	3	Visit3(w12)				2022-10-04	56										A	36.2	79	18	154/106	165	78.6	28.8	7.04	15.6	5.33	216	60.3	28.7	35	46	1.1	73.6	6.2	170	33	106	214	94	5.9		1.39	16.1	327
28339988	RA-53-D	M	1975-03-26	C/C	3	Visit3(w12)				2022-10-18	47										D	36.2	75	18	129/69	175.9	93	30	6.24	13.7	4.98	255	68.8	22.4	35	77	0.9	96.13	6.9	186	43	124	205	100	5.4		3.38	5.4	347
61622197	RA-54-C	M	1985-07-11	C/C	3	Visit3(w12)				2022-11-01	37										C	36.1	72	17	119/75	182	78.8	23.7	3.42	14.4	4.01	165	36.6	52.6	48	49	1	89.37	5.5	194	96	82	142	86	4.9		0.64	4.1	278
47029914	RA-55-A	M	1991-02-09	C/T	3	Visit3(w12)				2022-10-27	31										A	36.2	64	18	125/73	178	92.9	29.3	5.52	15.1	5.06	228	54.6	38.6	23	47	1.1	82.98	7.2	168	33	101	337	83	5.2		<0.60	7.5	312
20147993	RA-56-B	M	1999-11-20	C/T	3	Visit3(w12)				2022-10-27	22										B	36.5	74	18	148/79	176	86	27.7	10.26	15	5.13	284	69.1	25.9	57	133	0.9	112.15	7.7	358	54	292	142	97	5.9		1.09	8.9	360
30666740	RA-57-C	F	1971-07-22	C/C	3	Visit3(w12)				2022-11-09	51										C	36.5	81	18	108/66	157	68.7	27.8	3.69	14.3	4.72	277	48.5	41.5	20	14	0.7	93.76	5.4	221	50	161	95	96	5.3		<0.60	3	190
26092179	RA-58-A	F	1958-03-10	C/C	3	Visit3(w12)				2022-11-09	64										A	36.4	85	18	151/104	163.4	81.4	30.4	6.47	15.4	5.02	170	61.3	29.5	18	20	0.9	67	5.5	171	64	88	160	96	5.3		1.02	7.8	330
17618458	RA-60-D	F	1957-10-30	C/C	3	Visit3(w12)				2022-11-29	64										D	36.2	79	18	147/83	152.4	66.3	28.5	7.26	14.4	4.22	238	74.2	20.8	25	30	0.6	106.97	4.2	251	56	179	157	95	5.9		3.88	5.6	294
19342620	RA-61-D	M	1961-12-02	C/C	3	Visit3(w12)				2022-12-08	60										D	36.2	67	20	145/82	180	118.8	36.2	6.9	13.5	4.25	238	60.9	27.4	27	57	1	81.01	5.6	162	46	97	177	94	5.7		0.94	4.6	373
10003765	RA-62-A	M	1978-08-12	C/C	3	Visit3(w12)				2022-12-15	44										A	36.6	91	18	145/90	166	130.6	47.3	10.21	16.3	5.55	362	62.7	26.4	9	18	0.8	111.62	7.5	210	43	149	181	91	5.8		9.1	9.1	313
50710718	RA-63-C	M	1959-09-01	C/C	3	Visit3(w12)				2022-12-20	63										C	36.1	80	18	113/58	174	76.9	25.3	6.42	16.1	5.16	228	64.7	26.9	20	24	1	80.21	4.8	173	65	108	45	103	5.7		<0.60	4.3	256
35429403	RA-64-B	F	1964-03-03	C/C	3	Visit3(w12)				2022-12-21	58										B	36.2	80	18	116/73	160	74.8	29.2	6.07	14.8	4.8	285	63.7	30.8	22	34	0.7	91.35	6.2	230	53	145	261	95	5.9		1.43	6.9	307
15058943	RA-01-D	F	1954-01-28	C/C	4	Visit4(w24)				2022-03-15	68										D	36.5	64	20	133/82	159	70	27.6	4.98	14.2	4.57	147	48.2	42.6	63	88	0.9	66.18	6.7	241	57	175	133	112	5.8	31.34	1.08	7.2	287
20324286	RA-02-C	M	1964-04-13	C/C	4	Visit4(w24)				2022-03-12	57										C	36.6	74	19	148/92	173	82.4	27.5	6.87	16.2	5.47	321	49.5	37.3	31	57	1	81.86	6.2	182	41	121	157	123	6.7	10.56	2.25	4.3	345
20088899	RA-03-C	M	1984-01-21	C/C	4	Visit4(w24)				2022-03-15	37.9028										C	36.2	87	18	134/89	181	113.2	34.5	8.31	16.1	5.21	270	61.3	33.1	19	34	0.8	115.61	6.3	196	45	113	307	92	5.3	17.33	2.89	5.6	379
12788461	RA-04-A	M	1974-05-14	C/C	4	Visit4(w24)				2022-03-14	47										A	36.5	80	14	161/107	168	95.5	33.8	7.52	17.1	5.35	301	54.8	35.8	65	133	0.8	110.13	6.4	193	53	132	79	90	5.8	53.27	1.43	10.2	364
61324299	RA-05-D	M	1970-10-27	C/T	4	Visit4(w24)				2022-03-12	51										D	36.6	60	15	131/78	170	99.1	34.2	4.83	14.6	4.69	173	63.7	28.6	16	18	0.9	94.93	6.7	201	49	151	60	88	5.3	12.51	0.87	15.3	226
20153903	RA-06-A	M	1966-12-02	C/C	4	Visit4(w24)				2022-03-23	55										A	36.3	73	16	131/84	164.2	59.5	22	5.52	16.4	5.51	215	70.2	24.1	41	86	0.9	93.46	7.8	206	43	145	108	95	5.6	8.46	2.03	5.3	364
16174459	RA-07-D	F	1942-10-05	C/C	4	Visit4(w24)				2022-03-29	79										D	37.4	70	16	139/80	154.1	53.8	22.6	6.12	14.8	4.87	204	53.5	38.9	42	49	0.7	85.79	5.2	193	51	132	114	115	6	9.64	0.64	3.9	248
76198455	RA-09-B	M	1973-03-17	C/T	4	Visit4(w24)				2022-04-06	49										B	36.6	92	18	121/69	178	83	26.1	6.36	14.5	4.48	227	68	25	45	47	0.8	109.66	7.2	183	47	104	259	90	5.7	7.98	<0.60	7	392
19710025	RA-10-A	F	1959-09-03	C/C	4	Visit4(w24)				2022-04-11	62										A	36.5	78	16	156/78	151.6	56.2	24.4	8.54	13.7	4.73	361	69.1	25.5	37	51	0.8	77.25	4.8	166	64	102	90	84	5.7	3.63	1.43	4.6	290
18253119	RA-11-C	M	1965-09-25	C/C	4	Visit4(w24)				2022-04-07	56										C	36.5	75	16	111/77	171.5	78	26.5	6.78	16.1	5.12	237	49	35.5	44	86	0.7	123.99	5.3	177	58	118	45	109	5.8	16.14	0.72	5.5	282
19374548	RA-12-B	F	1947-02-12	C/T	4	Visit4(w24)				2022-04-11	75										B	36.4	63	18	127/80	150	59.3	26.3	4.32	12.7	4.19	177	36	56.7	44	54	0.6	103.87	3.9	157	46	97	110	84	5.6	13.78	<0.60	10.7	245
19334074	RA-13-C	M	1960-10-21	C/C	4	Visit4(w24)				2022-04-19	61										C	36.4	77	18	157/90	179.6	85.3	26.4	5.15	13.9	4.74	249	68.9	19.6	32	44	0.9	91.18	6.4	196	46	102	346	116	5.4	11.85	<0.60	5.3	345
20080496	RA-15-A	M	1972-07-07	C/C	4	Visit4(w24)				2022-04-29	49										A	36.3	77	17	129/85	177.2	80	25.4	7.78	15.6	4.94	317	62.5	30.2	25	49	0.7	127.4	7.6	156	34	101	215	103	5.5	13.51	<0.60	6.1	310
18959526	RA-16-B	M	1960-06-02	C/C	4	Visit4(w24)				2022-05-05	61										B	36.5	89	19	134/96	169.6	64	22.2	6.84	15.1	4.73	279	56.9	31.4	21	24	0.9	91.18	7.9	194	56	118	127	97	5.8	13.96	1.16	5.3	226
61648838	RA-17-C	M	1970-09-26	C/T	4	Visit4(w24)				2022-06-20	51										C	36.3	70	18	108/62	179.5	76.2	23.6	5.9	14.7	5.31	187	48	44.1	27	41	1	83.73	6.5	175	41	123	99	94	5.6	8.56	1.47	5	351
15835125	RA-18-A	M	1970-02-18	C/C	4	Visit4(w24)				2022-06-30	52										A	36.5	65	18	137/85	170	81.4	28.1	6.74	12.7	6.53	241	54.3	35.9	17	21	1	83.73	7.9	137	42	91	82	96	5.9	4.93	<0.60	3.9	247
20143795	RA-19-C	M	1955-09-01	C/C	4	Visit4(w24)				2022-07-04	66										C	36.1	63	17	117/74	165.8	79.6	28.9	3.99	14	4.49	240	45.5	42.6	52	67	0.8	102.8	4.9	141	48	82	165	90	5.7	13.5	<0.60	3.1	293
15580216	RA-20-D	M	1970-12-09	C/C	4	Visit4(w24)				2022-07-05	51										D	36.2	82	18	131/90	173.5	91.4	30.3	4.71	15.2	4.83	267	48.3	42.3	29	46	1.2	67.84	7	172	35	124	168	98	5.8	9.53	1.04	9.6	361
40987968	RA-22-B	M	1969-12-09	C/C	4	Visit4(w24)				2022-08-02	59										B	36.2	71	18	136/83	169.3	66.7	23.2	6.13	17.3	5.85	226	61.3	30.8	26	40	1	81.29	5	190	34	123	245	107	5.5	18.1	1.88	6.4	389
72168762	RA-23-A	M	1966-11-06	C/C	4	Visit4(w24)				2022-08-08	55										A	36.5	77	15	123/83	165	76.6	28.1	5.47	14	4.48	208	60.9	27.4	44	42	1.2	66.81	7.1	173	54	106	99	108	5.9	7.43	<0.60	5.6	293
20531834	RA-24-B	M	1986-08-12	C/C	4	Visit4(w24)				2022-08-13	38										B	36.5	66	18	115/73	179.1	93.8	29.2	7.06	15.1	5.04	267	54.4	33	37	109	0.8	114.99	8.6	174	32	87	328	91	5.5	17.3	0.67	4.5	286
16802573	RA-25-D	M	1967-10-07	C/C	4	Visit4(w24)				2022-08-10	54										D	36.5	56	17	126/83	170.4	71.5	24.6	5.93	13.3	4.68	237	50.3	37.1	33	35	0.9	93.46	6.4	181	41	129	84	89	6.1	3.21	3.09	3.5	270
61581519	RA-26-A	M	1969-12-09	C/C	4	Visit4(w24)				2022-08-11	52										A	36.5	79	17	146/90	169	85	29.7	5.94	15.5	4.9	275	53.4	31.1	29	49	1.2	67.58	5.4	200	44	133	176	96	5.8	12.1	1.84	4.7	317
14687432	RA-27-C	M	1975-02-15	C/C	4	Visit4(w24)				2022-08-16	47										C	36.4	81	20	131/95	171	97.6	33.3	6.97	16.8	5.64	235	63	27.1	50	66	1	85.13	6.8	146	36	94	127	91	5.4	33.1	2.13	10.6	400
61643295	RA-28-D	M	1978-08-01	C/C	4	Visit4(w24)				2022-08-12	43										D	36.3	62	15	104/62	181.2	89.7	27.3	6.48	14.2	4.49	202	46.4	36.6	19	30	1	86.68	5	196	44	138	130	89	5.3	12.8	1	5.3	376
61930267	RA-29-B	M	1956-02-27	C/C	4	Visit4(w24)				2022-08-16	65										B	36.2	80	18	131/84	166.8	73.5	26.4	4.93	13.8	4.92	273	58.9	31.8	28	37	0.9	90.01	6.4	192	39	138	145	122	6.7	17	3	6.1	292
76231564	RA-30-A	F	1960-05-22	C/C	4	Visit4(w24)				2022-08-18	61										A	36.5	69	16	121/71	148.8	52.3	23.6	5.81	15.2	5.3	327	63.5	30.8	25	31	0.6	108.02	6.1	212	61	140	144	121	6.4	29.8	0.63	3.8	285
61630657	RA-31-D	F	1985-09-27	C/C	4	Visit4(w24)				2022-08-25	36										D	36.3	68	16	123/78	157.8	65.4	26.2	5.6	13.6	4.47	243	63.2	30.2	16	15	0.7	100.63	5.1	166	58	106	49	93	5.3	16.2	1.05	4.1	265
18900726	RA-32-C	M	1975-06-22	T/T	4	Visit4(w24)				2022-08-22	46										C	36.4	71	18	128/76	173.6	87.3	28.9	6.3	16	5.13	228	59.3	32.1	28	33	0.8	110.61	7.6	357	32	119	1025	89	5.9	9.53	0.95	3.5	314
20539016	RA-33-C	M	1963-11-10	C/C	4	Visit4(w24)				2022-08-18	58										C	36.3	77	18	123/78	169	78.4	27.4	5.47	14.7	6.73	216	59.3	32.2	23	26	1.1	73.08	2.8	177	38	128	100	96	6.1	6.26	0.78	4.3	287
30439721	RA-34-D	M	1968-05-17	T/T	4	Visit4(w24)				2022-08-29	53										D	36.5	75	18	123/74	182	83.6	25.2	6.7	16.5	5.33	242	65.2	24.9	29	52	1.1	74.42	1	190	43	131	169	104	5.8	12.6	0.65	3.7	258
41457285	RA-35-B	F	1976-07-13	C/C	4	Visit4(w24)				2022-08-30	45										B	36.3	96	18	143/86	160.3	78.7	30.6	8.64	14.2	4.53	377	64.8	28	21	21	0.7	96.18	6.8	203	57	129	225	108	5.2	26.7	6.38	4.4	321
50375494	RA-36-A	M	1965-12-25	C/T	4	Visit4(w24)				2022-09-13	56										A	36.5	95	21	165/104	173	102.7	34.3	11.37	16.3	5.67	237	59.5	26.9	50	74	1.4	55.72	6.7	233	44	151	344	84	6.2	93.5	2.33	15.4	378
20539454	RA-37-B	M	1984-03-23	C/C	4	Visit4(w24)				2022-09-22	38										B	36.1	79	18	108/75	171.4	92.5	31.4	9.94	14.3	4.83	340	58.2	34.1	16	32	0.9	100.37	5.1	149	23	76	402	85	5.2	9.52	3.33	4.4	365
18814633	RA-38-D	F	1959-11-14	C/C	4	Visit4(w24)				2022-09-27	62										D	36.2	82	18	126/92	151	53.9	23.6	5.15	13.1	4.36	237	43.6	44.3	16	17	0.5	132.88	5.5	249	71	165	134	98	6.2	6.94	2.85	3.2	247
20146904	RA-39-C	F	1963-07-19	C/C	4	Visit4(w24)				2022-09-27	58										C	36.2	76	18	125/71	155	68.3	28.4	8.2	13.3	4.39	246	52.9	37	24	23	0.9	68.35	5.4	174	52	109	99	86	6	5.14	1.49	5	253
16797162	RA-40-D	M	1973-12-22	C/T	4	Visit4(w24)				2022-09-29	48										D	36.1	76	17	133/90	182.2	97.5	29.3	6.26	14.8	4.75	204	53.7	36.9	49	104	1	84.77	7.2	213	33	177	105	91	5.7	30	1.38	8.1	311
17735403	RA-41-A	M	1958-10-03	C/T	4	Visit4(w24)				2022-09-29	63										A	36.4	75	17	119/75	165	56.8	20.8	6.04	15	4.91	204	55.8	36.6	16	20	0.7	121.06	5	160	46	109	115	101	5.6	6.3	<0.60	3.5	186
41180761	RA-42-A	F	1978-09-04	C/C	4	Visit4(w24)				2022-09-28	43										A	36.2	79	18	118/67	167	76.5	27.4	10.81	12.9	4.06	365	65.4	27.1	25	28	0.5	143.12	4	198	54	129	119	109	5.7	10.9	12.82	5.6	314
41524219	RA-43-D	M	1987-03-24	C/C	4	Visit4(w24)				2022-10-03	35										D	36.2	64	18	127/87	167	90.4	32.4	8.06	16.3	5.6	239	60.9	32.8	18	24	0.8	116.92	5.3	149	37	97	77	88	5.4	18.6	2.5	5.1	259
61102431	RA-44-B	F	1962-03-15	C/C	4	Visit4(w24)				2022-10-03	60										B	36.5	64	18	131/72	145.4	54.2	25.6	7.09	13.3	4.43	218	55.6	37.7	18	25	0.5	133.76	4.2	166	51	90	154	93	6.1	6.85	<0.60	2.8	299
41013199	RA-45-C	F	1966-01-11	C/T	4	Visit4(w24)				2022-10-05	56										C	36.1	77	18	128/78	153	52.4	22.3	6.91	12.1	3.78	193	60.2	31.4	28	19	0.6	109.91	4.1	133	37	63	195	80	5.8	4.56	2.59	5	267
35769426	RA-46-A	M	1955-01-05	C/C	4	Visit4(w24)				2022-10-05	67										A	36.3	69	16	144/81	162.7	61	23	5.81	12.6	4.32	257	62	30.3	17	19	0.8	102.48	7.2	188	41	129	127	91	6.4	2.39	4.53	4.8	285
20200949	RA-47-C	M	1978-01-04	C/T	4	Visit4(w24)				2022-10-22	44										C	36.1	71	18	149/86	170	68.2	23.5	6.19	15.6	5.18	221	61.9	25.2	53	95	1	86.28	7	210	36	155	161	113	6.3	11.6	1.74	6.9	380
19303713	RA-48-B	M	1975-03-15	C/T	4	Visit4(w24)				2022-11-15	47										B	36	87	18	129/80	168	79	27.9	7.99	14.4	4.99	263	60	32.3	30	43	1	85.13	7.3	177	33	107	264	80	5.2	13	1.99	12.4	312
61245247	RA-49-B	M	1978-12-20	C/T	4	Visit4(w24)				2022-11-17	43	B									B	36.5	70	16	156/103	170	88.6	30.6	7.66	17	5.56	179	54.5	33.8	43	83	0.9	97.89	6	171	58	107	65	102	6	9.26	1.12	6	353
60529165	RA-50-D	M	1946-10-12	C/T	4	Visit4(w24)				2022-11-22	75										D	36.5	73	18	137/78	168	79.3	28	5.8	12.5	4.05	238	58.1	33.8	19	32	0.9	87.43	5	176	61	109	58	82	5.9	10.8	<0.60	5.7	392
30608882	RA-51-B	M	1970-09-01	C/C	4	Visit4(w24)				2022-12-22	51										B	35.8	90	18	127/78	168	83.2	29.4	5.24	14.2	4.82	341	42.5	41	37	66	0.9	94.55	8.3	212	56	150	91	103	5.9	16.9	0.82	7.9	339
41391163	RA-52-A	M	1965-09-03	C/C	4	Visit4(w24)				2022-12-28	56										A	35.9	89	18	157/108	165	77	28.2	6.21	16.2	5.43	203	60.9	28	31	39	1	82.15	5.8	168	32	117	182	102	5.8	16.6	1.95	11.2	302
28339988	RA-53-D	M	1975-03-26	C/C	4	Visit4(w24)				2023-01-10	47										D	36	64	18	125/61	175.9	92	29.7	5.11	13.7	4.84	253	66.2	25.4	27	39	0.9	96.13	7.7	206	45	147	145	98	5.5	20.1	1.2	4.7	315
61622197	RA-54-C	M	1985-07-11	C/C	4	Visit4(w24)				2023-01-17	37										C	36	77	18	111/63	182	80.4	24.2	3.17	14.5	4.07	175	47.4	38.8	56	43	0.9	100.92	7.4	201	113	74	87	84	4.6	4.82	<0.60	3.5	307
47029914	RA-55-A	M	1991-02-09	C/T	4	Visit4(w24)				2023-01-16	31										A	36.5	82	18	133/76	178	92.1	29	5.22	15.3	5.25	372	57.5	35.6	29	50	1.2	75.06	6.9	178	32	117	263	89	5.7	18.5	<0.60	6	281
20147993	RA-56-B	M	1999-11-20	C/T	4	Visit4(w24)				2023-01-12	22										B	36.6	66	18	127/86	176	87	28	6.58	15	5.2	300	45.7	44.8	170	365	0.9	112.15	9.1	299	36	228	270	95	6.3	26.6	1.66	10	335
30666740	RA-57-C	F	1971-07-22	C/C	4	Visit4(w24)				2023-02-01	51										C	36.3	62	18	117/66	157	69.2	28	4.45	13.5	4.41	243	53.2	38.7	26	21	0.7	93.76	5.5	247	56	189	80	89	5.9	7.18	<0.60	3.3	263
26092179	RA-58-A	F	1958-03-10	C/C	4	Visit4(w24)				2023-02-01	64										A	36	94	18	143/88	163.4	80.6	30.1	5.15	15.6	4.99	196	55.8	35.3	22	32	1	59.33	5.5	199	83	108	135	102	missing	9.6	1.38	6.8	339
17618458	RA-60-D	F	1957-10-30	C/C	4	Visit4(w24)				2023-02-21	64										D	36.5	74	18	158/82	152.4	66.4	28.5	6.16	14.7	4.41	232	66.8	27.4	24	24	0.6	106.97	4.4	235	58	169	137	96	5.7	4.83	2.38	2.2	284
19342620	RA-61-D	M	1961-12-02	C/C	4	Visit4(w24)				2023-03-02	60										D	35.9	62	18	117/63	180	120.7	37.2	7.39	14.1	4.32	285	69.6	20.4	40	78	1.1	72.57	4.7	134	44	68	174	100	5.8	20.5	1.26	7.4	349
10003765	RA-62-A	M	1978-08-12	C/C	4	Visit4(w24)				2023-03-09	44										A	36.5	85	18	151/90	166	130	47.1	10.78	16.4	5.57	357	63	26.2	10	21	0.8	111.62	7.2	240	45	175	214	104	6.3	20.9	9.82	8.4	341
50710718	RA-63-C	M	1959-09-01	C/C	4	Visit4(w24)				2023-03-14	63										C	36	75	18	121/68	174	77.5	25.5	8.11	15.7	5	208	66.8	24.3	20	27	1	80.21	4.6	196	70	123	68	106	5.7	8.85	3.5	4.5	263
35429403	RA-64-B	F	1964-03-03	C/C	4	Visit4(w24)				2023-03-14	58										B	36.4	72	18	117/83	160	75.1	29.3	5.7	13.9	4.38	279	54	39.6	18	27	0.6	109.13	6	177	44	65	396	92	5.6	15.8	2.13	3.8	316
15058943	RA-01-D	F	1954-01-28	C/C	5	Visit5(w36)				2022-06-02	68										D	36.4	86	20	123/81	159	70.3	27.8							64	86	0.7	88.45	5.7	230	57	156	133	96			0.88
20324286	RA-02-C	M	1964-04-13	C/C	5	Visit5(w36)				2022-06-11	57										C	36.2	70	19	120/79	173	82	27.3							29	51	1	81.86	6.2	212	41	138	197	117
20088899	RA-03-C	M	1984-01-21	C/C	5	Visit5(w36)				2022-06-14	37.9028										C	36.3	103	18	149/96	181	113.5	34.6							26	35	1	88.88	6.9	241	54	167	210	90
12788461	RA-04-A	M	1974-05-14	C/C	5	Visit5(w36)				2022-06-06	47										A	36.7	83	14	173/122	168	94.9	33.6							54	107	0.9	96.13	6.4	161	43	103	133	101			2.23
61324299	RA-05-D	M	1970-10-27	C/T	5	Visit5(w36)				2022-06-11	51										D	36.5	84	15	122/69	170	96.6	33.4							16	19	1	83.73	6.4	201	46	151	46	87
20153903	RA-06-A	M	1966-12-02	C/C	5	Visit5(w36)				2022-06-15	55										A	36.2	70	18	145/95	164.2	58.4	21.6							44	92	0.9	93.46	7.3	206	47	146	88	109
16174459	RA-07-D	F	1942-10-05	C/C	5	Visit5(w36)				2022-06-21	79										D	37.1	70	16	159/83	154.1	52.8	22.2							40	42	0.8	73.54	4.9	167	52	109	80	118
76198455	RA-09-B	M	1973-03-17	C/T	5	Visit5(w36)				2022-06-29	49										B	36.4	91	18	117/68	178	82	25.8							37	47	0.9	95.72	8.1	182	40	103	293	86
19710025	RA-10-A	F	1959-09-03	C/C	5	Visit5(w36)				2022-07-11	62										A	36.2	70	16	136/76	151.6	56.5	24.5							36	37	0.8	77.25	4.9	175	55	115	83	89
18253119	RA-11-C	M	1965-09-25	C/C	5	Visit5(w36)				2022-07-07	56										C	36	72	16	130/87	171.5	75.5	25.6							27	41	0.8	106.28	4.9	171	61	109	49	92
19374548	RA-12-B	F	1947-02-12	C/T	5	Visit5(w36)				2022-07-04	75										B	36.5	65	18	134/79	150	58	25.7							41	49	0.6	103.87	3.9	184	50	124	71	92
19334074	RA-13-C	M	1960-10-21	C/C	5	Visit5(w36)				2022-07-12	61										C	36.3	79	18	149/97	179.6	86.4	26.7							32	39	1	80.74	7	179	49	109	223	99
20080496	RA-15-A	M	1972-07-07	C/C	5	Visit5(w36)				2022-07-30	49										A	36.6	98	18	127/78	177.2	79.8	25.4							27	58	0.9	95.33	8.8	154	35	84	304	109
18959526	RA-16-B	M	1960-06-02	C/C	5	Visit5(w36)				2022-07-28	61										B	36.5	78	18	123/87	169.6	63.4	22							35	30	1	80.74	8.6	196	56	121	116	108
61648838	RA-17-C	M	1970-09-26	C/T	5	Visit5(w36)				2022-09-22	51										C	36.7	81	17	129/78	179.5	76.3	23.6							30	59	0.9	94.55	6	160	36	118	72	91
15835125	RA-18-A	M	1970-02-18	C/C	5	Visit5(w36)				2022-09-22	52										A	36.3	58	18	146/77	170	79.9	27.6							29	41	1	83.73	7.3	139	48	82	73	100
20143795	RA-19-C	M	1955-09-01	C/C	5	Visit5(w36)				2022-09-26	66										C	36.5	70	17	118/77	165.8	79.3	28.8							57	76	0.9	89.73	5.5	136	46	78	128	95
15580216	RA-20-D	M	1970-12-09	C/C	5	Visit5(w36)				2022-09-27	51										D	36	92	18	126/78	173.5	91.5	30.3							33	53	1.1	75.01	7.5	162	39	103	176	113
40987968	RA-22-B	M	1969-12-09	C/C	5	Visit5(w36)				2022-10-25	59										B	36.1	63	18	125/77	169.3	70.7	24.6							27	46	1.1	72.82	4.8	200	39	144	164	113
72168762	RA-23-A	M	1966-11-06	C/C	5	Visit5(w36)				2022-10-31	55										A	36.1	77	16	136/92	165	80.1	29.4							34	34	1.2	66.81	6.3	199	63	133	84	111
20531834	RA-24-B	M	1986-08-12	C/C	5	Visit5(w36)				2022-11-01	38										B	36.5	64	18	129/77	179.1	97	30.2							34	73	0.8	114.99	8.3	165	34	82	326	84
16802573	RA-25-D	M	1967-10-07	C/C	5	Visit5(w36)				2022-11-02	54										D	36.3	53	17	136/88	170.4	71.4	24.5							20	18	0.9	93.46	5.4	151	44	101	73	91
61581519	RA-26-A	M	1969-12-09	C/C	5	Visit5(w36)				2022-11-03	52										A	36.5	77	18	142/87	169	83.3	29.1							21	22	1.1	74.71	4.7	125	48	67	88	93
14687432	RA-27-C	M	1975-02-15	C/C	5	Visit5(w36)				2022-11-15	47										C	36.5	81	20	159/108	171	97.3	33.2							34	60	1	85.13	7.9	137	39	91	91	87
61643295	RA-28-D	M	1978-08-01	C/C	5	Visit5(w36)				2022-11-14	43										D	36.1	70	16	106/66	181.2	88.5	26.9							26	29	1.3	63.74	8.5	198	38	141	151	81
61930267	RA-29-B	M	1956-02-27	C/C	5	Visit5(w36)				2022-11-15	65										B	36.3	65	18	132/78	166.8	74.7	26.8							27	39	0.9	90.01	6	213	34	96	445	115
76231564	RA-30-A	F	1960-05-22	C/C	5	Visit5(w36)				2022-11-17	61										A	36.7	70	16	139/83	148.8	53.7	24.2							20	24	0.6	108.02	5.4	167	62	99	119	111
61630657	RA-31-D	F	1985-09-27	C/C	5	Visit5(w36)				2022-11-23	36										D	36.1	72	16	128/68	157.8	66.7	26.7							16	16	0.6	120.23	5.2	175	65	109	46	98
18900726	RA-32-C	M	1975-06-22	T/T	5	Visit5(w36)				2022-11-14	46										C	36.1	70	18	137/85	173.6	86.9	28.8							24	27	0.9	96.56	5.1	212	42	118	337	83
20539016	RA-33-C	M	1963-11-10	C/C	5	Visit5(w36)				2022-11-24	58										C	36.6	77	18	127/73	169	77.9	27.2							24	36	1	81.57	6.6	185	44	126	104	88
30439721	RA-34-D	M	1968-05-17	T/T	5	Visit5(w36)				2022-11-21	53										D	36.2	77	20	127/80	182	83.8	25.2							38	61	1	83.08	1	205	41	140	241	96
41457285	RA-35-B	F	1976-07-13	C/C	5	Visit5(w36)				2022-11-23	45										B	36.3	92	18	141/83	160.3	79.4	30.8							16	18	0.7	96.18	5.6	214	87	118	116	101
50375494	RA-36-A	M	1965-12-25	C/T	5	Visit5(w36)				2022-12-06	56										A	36.6	94	21	164/107	173	102.6	34.2							56	72	1.4	55.72	7.1	153	43	86	231	86
20539454	RA-37-B	M	1984-03-23	C/C	5	Visit5(w36)				2022-12-15	38										B	36	73	18	122/81	171.4	94.3	32							16	28	0.7	134.14	4.5	155	24	88	381	85
18814633	RA-38-D	F	1959-11-14	C/C	5	Visit5(w36)				2022-12-20	62										D	36.3	81	17	137/79	151	54.9	24							19	16	0.5	132.88	6	212	74	136	75	97
20146904	RA-39-C	F	1963-07-19	C/C	5	Visit5(w36)				2022-12-20	58										C	36	81	18	117/71	155	69.2	28.8							21	20	0.8	78.3	5.2	179	57	116	90	91
16797162	RA-40-D	M	1973-12-22	C/T	5	Visit5(w36)				2022-12-22	48										D	36.5	96	18	156/93	182.2	94.6	28.4							28	40	1.1	75.94	6.3	229	39	184	97	89
17735403	RA-41-A	M	1958-10-03	C/T	5	Visit5(w36)				2022-12-22	63	A									A	36.5	61	17	135/75	165	58	21.3							19	29	0.8	103.77	5.3	167	46	106	116	108
41180761	RA-42-A	F	1978-09-04	C/C	5	Visit5(w36)				2022-12-21	43										A	36.4	77	18	112/77	167	78.4	28.1							24	31	0.5	143.12	4.4	184	52	125	100	99
41524219	RA-43-D	M	1987-03-24	C/C	5	Visit5(w36)				2022-12-27	35										D	36	71	18	143/89	167	92.4	33.1							17	25	0.7	136.4	5.8	189	48	130	108	85
61102431	RA-44-B	F	1962-03-15	C/C	5	Visit5(w36)				2022-12-27	60										B	36.2	79	18	124/73	145.4	56	26.6							17	21	0.6	108.38	4.5	155	52	84	141	107
41013199	RA-45-C	F	1966-01-11	C/T	5	Visit5(w36)				2022-12-27	56										C	36.2	81	18	142/83	153	53.5	22.8							44	44	0.7	91.67	3.5	139	47	74	151	91
35769426	RA-46-A	M	1955-01-05	C/C	5	Visit5(w36)				2022-12-29	67										A	36	71	16	138/81	162.7	62.8	23.7							27	42	0.9	89.46	8	220	53	161	111	109
20200949	RA-47-C	M	1978-01-04	C/T	5	Visit5(w36)				2023-01-14	44										C	35.8	72	17	122/73	170	67.9	23.4							29	63	0.9	97.43	5.5	217	43	159	123	109
19303713	RA-48-B	M	1975-03-15	C/T	5	Visit5(w36)				2023-02-07	47										B	35.8	92	18	132/83	168	80.4	28.4							38	43	1.1	76.26	7	212	34	146	268	89
61245247	RA-49-B	M	1978-12-20	C/T	5	Visit5(w36)				2023-02-09	43	B									B	36.2	73	16	150/100	170	89.7	31							57	138	0.9	97.89	7	174	58	104	104	106
60529165	RA-50-D	M	1946-10-12	C/T	5	Visit5(w36)				2023-02-14	75										D	36.2	87	18	153/79	168	85.9	30.4							25	30	0.9	87.43	5.7	210	69	137	99	97
30608882	RA-51-B	M	1970-09-01	C/C	5	Visit5(w36)				2023-03-16	51										B	36.1	93	18	140/84	168	82.7	29.3							32	68	0.9	94.55	7.7	217	59	148	128	103
41391163	RA-52-A	M	1965-09-03	C/C	5	Visit5(w36)				2023-03-22	56										A	36	78	18	163/107	165	77.3	28.3							32	38	0.9	92.78	5.3	158	35	106	176	101
28339988	RA-53-D	M	1975-03-26	C/C	5	Visit5(w36)				2023-04-11	47										D	36.2	68	18	111/66	175.9	92.4	29.8							22	35	0.9	96.13	6.8	213	48	150	187	98
47029914	RA-55-A	M	1991-02-09	C/T	5	Visit5(w36)				2023-04-13	31										A	36.1	77	18	120/71	178	94	29.6							30	59	1.2	75.06	5.9	206	42	130	163	86
20147993	RA-56-B	M	1999-11-20	C/T	5	Visit5(w36)				2023-04-06	22										B	36.4	74	18	133/77	176	91.5	29.5							187	301	0.8	128.48	6.4	272	40	200	196	124
30666740	RA-57-C	F	1971-07-22	C/C	5	Visit5(w36)				2023-04-26	51										C	36	68	18	106/60	157	68.1	27.6							17	18	0.7	93.76	4.8	149	53	95	58	95
26092179	RA-58-A	F	1958-03-10	C/C	5	Visit5(w36)				2023-04-26	64										A	35.8	80	17	127/81	163.4	81.6	30.5							18	25	0.8	76.75	4.1	192	82	109	63	104	5.9
17618458	RA-60-D	F	1957-10-30	C/C	5	Visit5(w36)				2023-05-16	64										D	36.8	80	18	141/77	152.4	67.5	29							35	37	0.6	106.97	4	248	57	178	195	93
19342620	RA-61-D	M	1961-12-02	C/C	5	Visit5(w36)				2023-05-25	60										D	36.5	69	18	119/69	180	120.5	37.1							34	68	1.1	72.57	3.7	148	50	79	133	92
10003765	RA-62-A	M	1978-08-12	C/C	5	Visit5(w36)				2023-06-06	44										A	36.9	85	18	147/93	166	128.6	46.6							9	22	0.9	97.43	7	225	42	165	161	104
50710718	RA-63-C	M	1959-09-01	C/C	5	Visit5(w36)				2023-06-06	63										C	36.3	75	18	139/81	174	78	25.7							19	26	1	80.21	4.3	194	66	123	68	103
35429403	RA-64-B	F	1964-03-03	C/C	5	Visit5(w36)				2023-06-13	58										B	36	77	18	122/69	160	76.6	29.9							21	26	0.7	91.35	6	157	58	72	194	94
[truncated: 9 more columns]
